# Supplementary material for: Human Metastatic Melanoma Cell Lines Panel for In Vitro and In Vivo Investigations
Source: MDPI journal article supplement (doi:10.3390/jmp5010002), 2024-01-08
Supplement: s1 [file s1]

# Supplementary Materials

## 1. The tumor growth curves of the studied xenograft models

Xenografts mel Lap and mel Pet can be characterized as cultures with a short latent phase, during which 100% of tumors were achieved (the average volume of mel Lap was  $116.8 \pm 11.8 \text{ mm}^3$  by the 3rd day and for mel Pet  $47.9 \pm 15.2 \text{ mm}^3$  by the 7th day). Exponential growth phases were also short and were 18 and 7 days for mel Lap and mel Pet, respectively (average volume of mel Lap was  $116.8 \pm 11.8 \text{ mm}^3$  and for Mel Pet  $47.9 \pm 15.2 \text{ mm}^3$ ).

The stationary phases in these models were also short: for mel Lap and for mel Pet, they were 10 and 7 days, respectively, with the volumes being  $331 \pm 69.8 \text{ mm}^3$  for mel Lap and  $296.8 \pm 67.8 \text{ mm}^3$  for mel Pet. The duration of the growth phases of the mel Kas xenograft model was longer than that of mel Lap and mel Pet and lasted 14 days (latent period,  $V_{\text{avg}} = 22.8 \pm 5.6 \text{ mm}^3$ ), 29 days (exponential growth phase,  $V_{\text{avg}} = 261.5 \pm 20.7 \text{ mm}^3$ ), and 2 days (stationary phase,  $V_{\text{avg}} = 325.8 \pm 46.6 \text{ mm}^3$ ).

With the next passage, a trend towards a reduction in the duration of tumor emergence was observed for all models to 2 and 3 days for mel Lap and mel Pet, respectively, and 6 days for mel Pet. By the end of the observation period, mel Lap and mel Pet tumors had reached the following volumes:  $139.6 \pm 62.0 \text{ mm}^3$  by day 37 after implantation of mel Lap cell suspension and  $1321.4 \pm 803.6 \text{ mm}^3$  by day 21 after implantation of mel Pet cell suspension. Mel Kas tumors disappeared from the 6th to the 16th day, and the model was considered non-reproducible.

**Table S1.** Comparison of the duration of growth periods of xenograft models of primary cell cultures mel Kas, mel Lap and mel Pet.

|                         |                          |                                      | mel Kas                    | mel Pet                                               | mel Lap    |
|-------------------------|--------------------------|--------------------------------------|----------------------------|-------------------------------------------------------|------------|
| 1 <sup>st</sup> passage | Latent period            | 24-hour period after transplantation | 14                         | 7                                                     | 3          |
|                         |                          | Mean volume, mm <sup>3</sup>         | 22.8±5.6                   | 47.9±15.2                                             | 116.8±11.8 |
|                         | Exponential growth phase | 24-hour period after transplantation | 43                         | 14                                                    | 21         |
|                         |                          | Mean volume, mm <sup>3</sup>         | 261.5±20.7                 | 190.7±67.8                                            | 241.4±35.8 |
|                         | Stationary phase         | 24-hour period after transplantation | 45                         | 21                                                    | 24         |
|                         |                          | Mean volume, mm <sup>3</sup>         | 325.8±46.6                 | 296.8±67.8                                            | 331±69.2   |
| 2 <sup>nd</sup> passage | Latent period            | 24-hour period after transplantation | 6                          | 3                                                     | 2          |
|                         |                          | Mean volume, mm <sup>3</sup>         | 9.4±4.7                    | 68.8±4.3                                              | 101.8±12.2 |
|                         | Exponential growth phase | 24-hour period after transplantation | No<br>(tumor has resolved) | 21                                                    | 34         |
|                         |                          | Mean volume, mm <sup>3</sup>         |                            | 1321.4±803.6                                          | 114.4±66.9 |
|                         | Stationary phase         | 24-hour period after transplantation | No<br>(tumor has resolved) | Tumors were harvested in the exponential growth phase | 37         |
|                         |                          | Mean volume, mm <sup>3</sup>         |                            | Tumors were harvested in the exponential growth phase | 139.6±62.0 |
| Tumorigenicity          |                          |                                      | Yes                        | Yes                                                   | Yes        |
| Reproducibility         |                          |                                      | No                         | Yes                                                   | Yes        |

## 2. Mutation Analysis

**Table S2.** On-target coverage summary.

| Cell line                          | mel Kas | mel Lap | mel Pet |
|------------------------------------|---------|---------|---------|
| Mean coverage on target regions, % | 96.4    | 76.3    | 75.8    |
| Coverage at > 10x depth, %         | 96.2    | 95.3    | 95.2    |

**Table S3.** Single nucleotide variants (SNVs) summary.

|                                              | mel Kas | mel Lap | mel Pet |
|----------------------------------------------|---------|---------|---------|
| Total SNVs detected                          | 77652   | 78812   | 59965   |
| SNVs after filtering                         | 11589   | 13003   | 8379    |
| Coding SNVs after filtering                  | 4147    | 4874    | 3027    |
| Non-synonymous variants (NS)                 | 2517    | 3013    | 1909    |
| Synonymous variants (S)                      | 1630    | 1861    | 1118    |
| HC:C/ NS:S ratio                             | 1.5     | 1,6     | 1.7     |
| Tumor mutational burden* (variants per 1 Mb) | 45      | 63      | 35      |

\*TMB was calculated as the rate of non-synonymous variants (minus variants present in the database dbSNP common) per Mb of the exome (35.8 Mb).

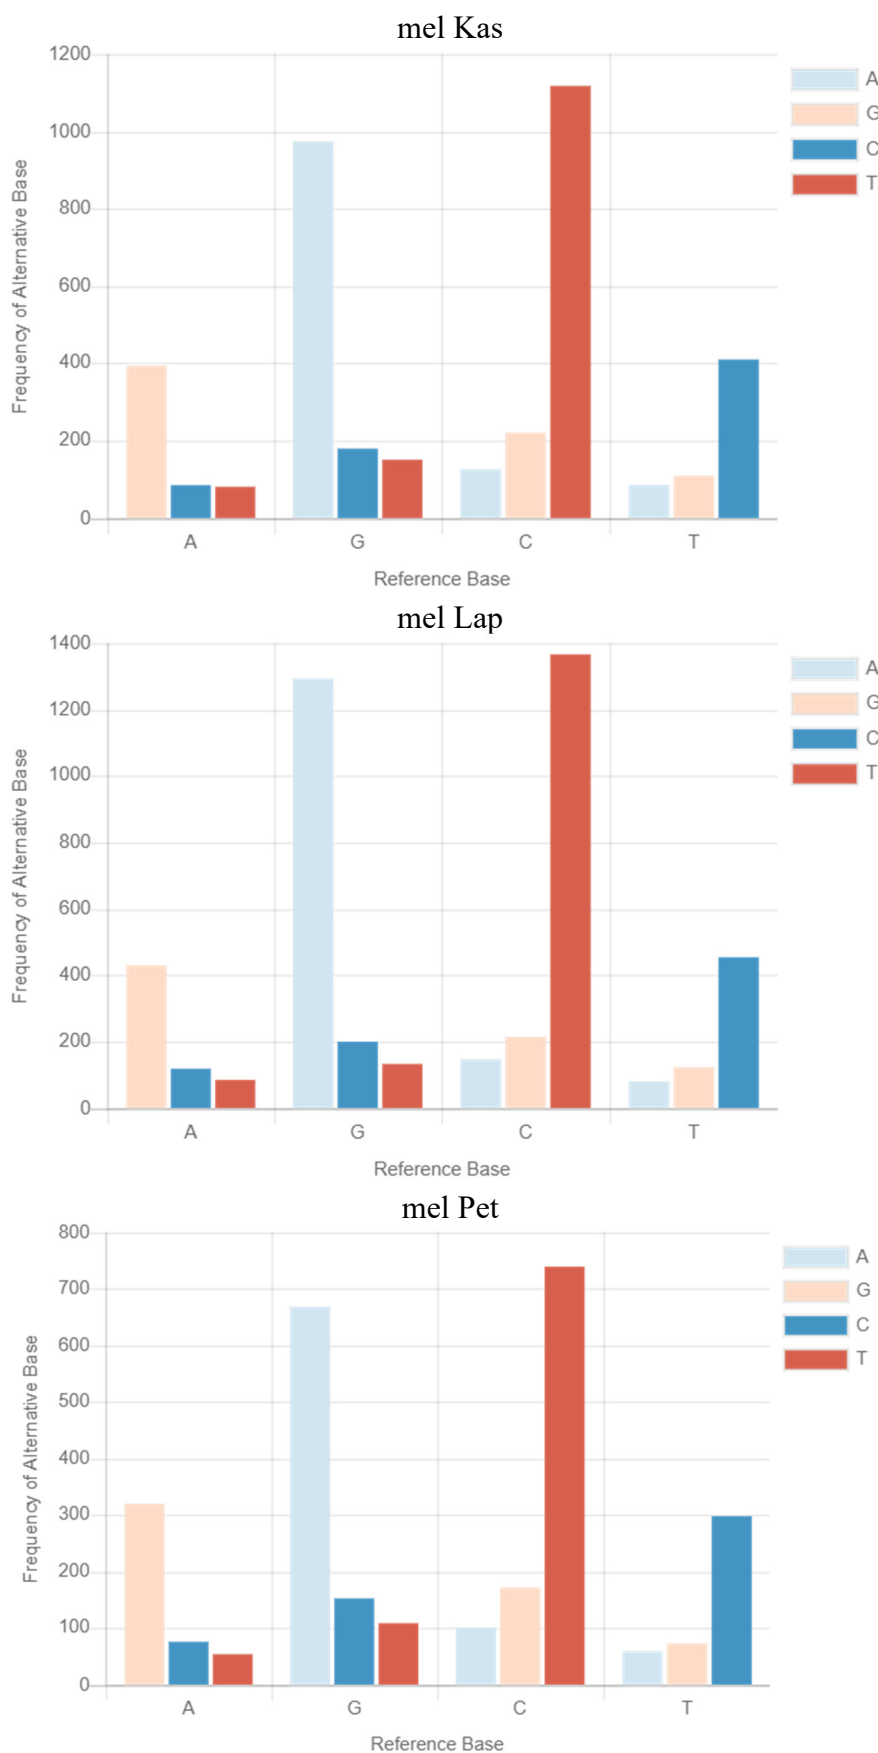

**Figure S1.** Patterns of nucleotide substitutions. On the abscissa axis - the base in the GRCh37 reference genome, on the ordinate axis - frequency of an alternative base. The bar color corresponds to the nucleotide substitution presented in the figure legend.
